# Supplementary material for: Injectable photocurable Janus hydrogel delivering hiPSC cardiomyocyte-derived exosome for post–heart surgery adhesion reduction
Source: PubMed Central journal article supplement — Sci Adv. 2023 Aug 4;9(31):eadh1753. doi: 10.1126/sciadv.adh1753 (PMC10403204; doi:10.1126/sciadv.adh1753), 2023-08-04
Supplement: sciadv.adh1753_sm.pdf [file sciadv.adh1753_sm.pdf]

Supplementary Materials for  
**Injectable photocurable Janus hydrogel delivering hiPSC  
cardiomyocyte-derived exosome for post–heart surgery adhesion reduction**

Ling Wang *et al.*

Corresponding author: Yaobin Wu, wuyaobin2018@smu.edu.cn; Caiwen Ou, oucaiwen@smu.edu.cn  
Wenhua Huang, hwh@smu.edu.cn

*Sci. Adv.* **9**, eadh1753 (2023)  
DOI: 10.1126/sciadv.adh1753

**The PDF file includes:**

Figs. S1 to S13  
Table S1  
Legends for movies S1 to S4

**Other Supplementary Material for this manuscript includes the following:**

Movies S1 to S4

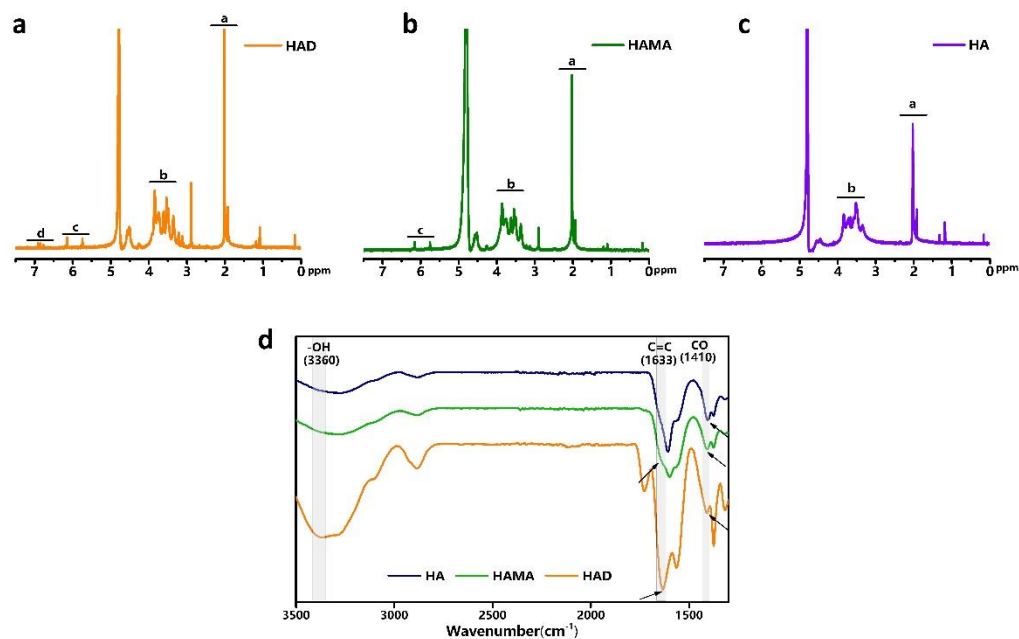

**Fig. S1.** (a-c) <sup>1</sup>H NMR spectra of HAD (a), HAMA (b) and HA (c) “a” labeled the C(=O)CH<sub>3</sub> in HA ( $\delta$  =2.1 ppm), “b” labeled protons in the ring structures of HA ( $\delta$  =4.0 ~3.0 ppm), “c” labeled the C=C of AEMA ( $\delta$ =5.68 and 6.13 ppm), “d” labeled protons in the catechol ring of DA ( $\delta$ =6.5~7.2 ppm). (d) FTIR spectra of HA, HAMA, and HAD in the range of 1300–3500 cm<sup>-1</sup>.

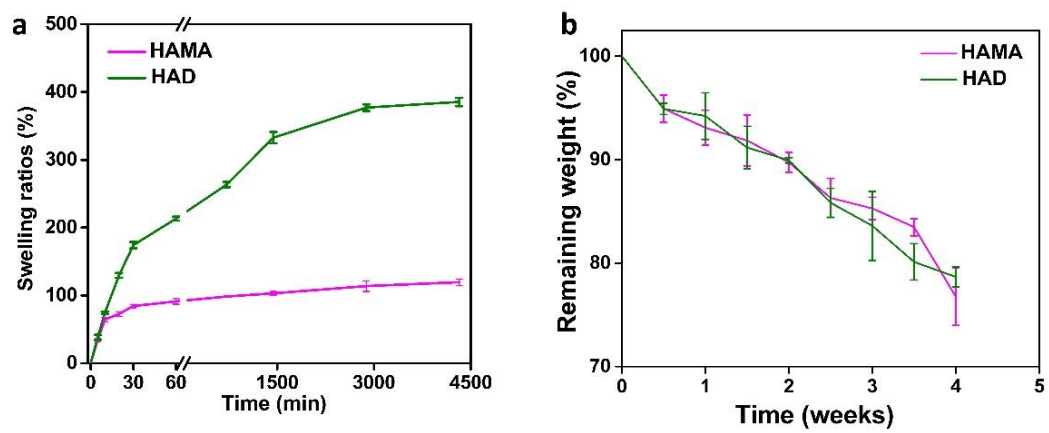

**Fig. S2.** The swelling behaviors and biodegrade curve of HAD and HAMA hydrogel.

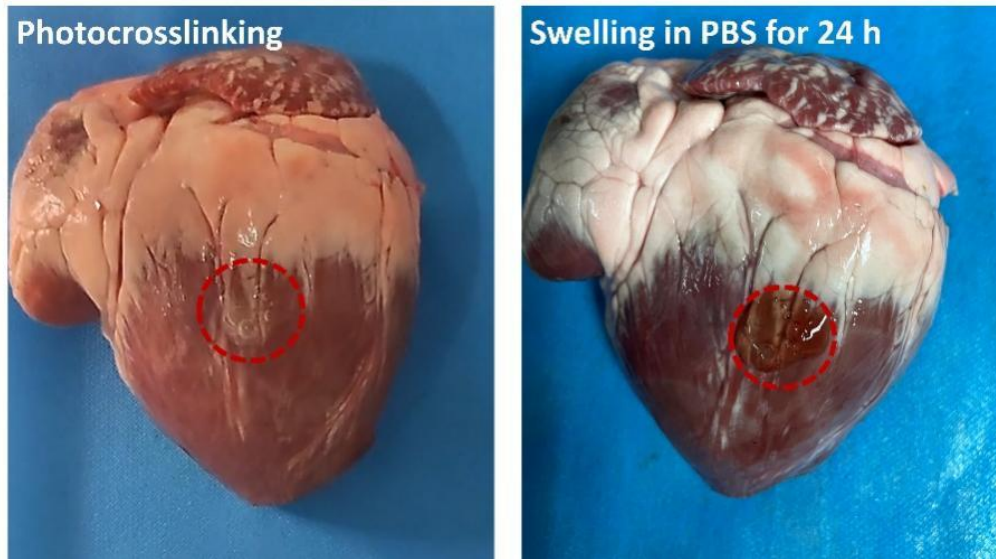

**Fig. S3.** After swelling in PBS for 24 h, the HAD hydrogel also maintained good adhesion on the heart surface.

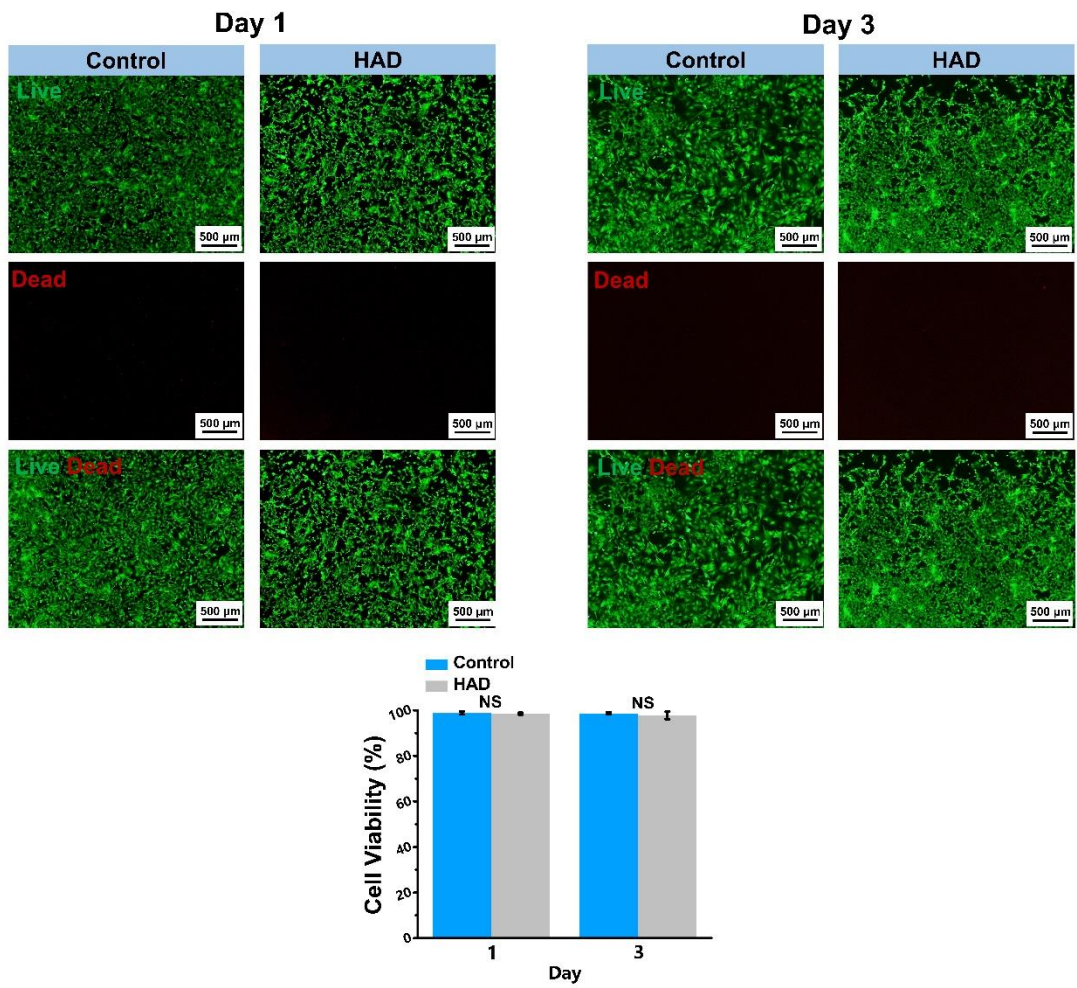

**Fig. S4.** The cell biocompatibility of HAD hydrogel *in vitro*. ns: no significant difference.

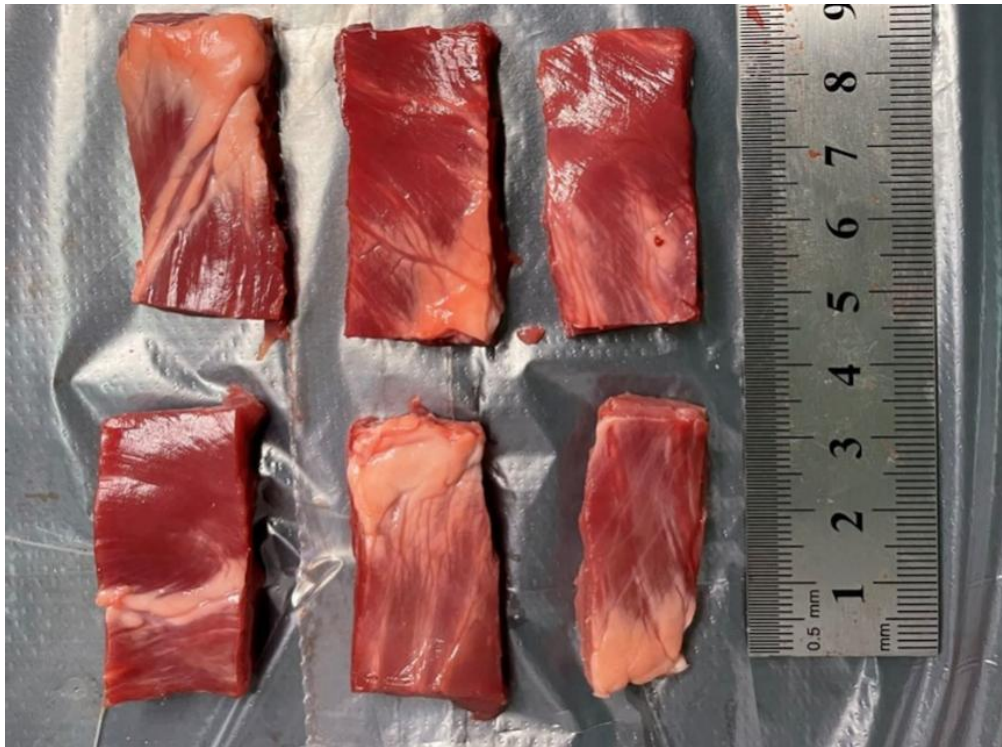

**Fig. S5.** The gross images of porcine heart tissue were cut into 15 mm × 30 mm × 6 mm pieces for the lap-shear tests.

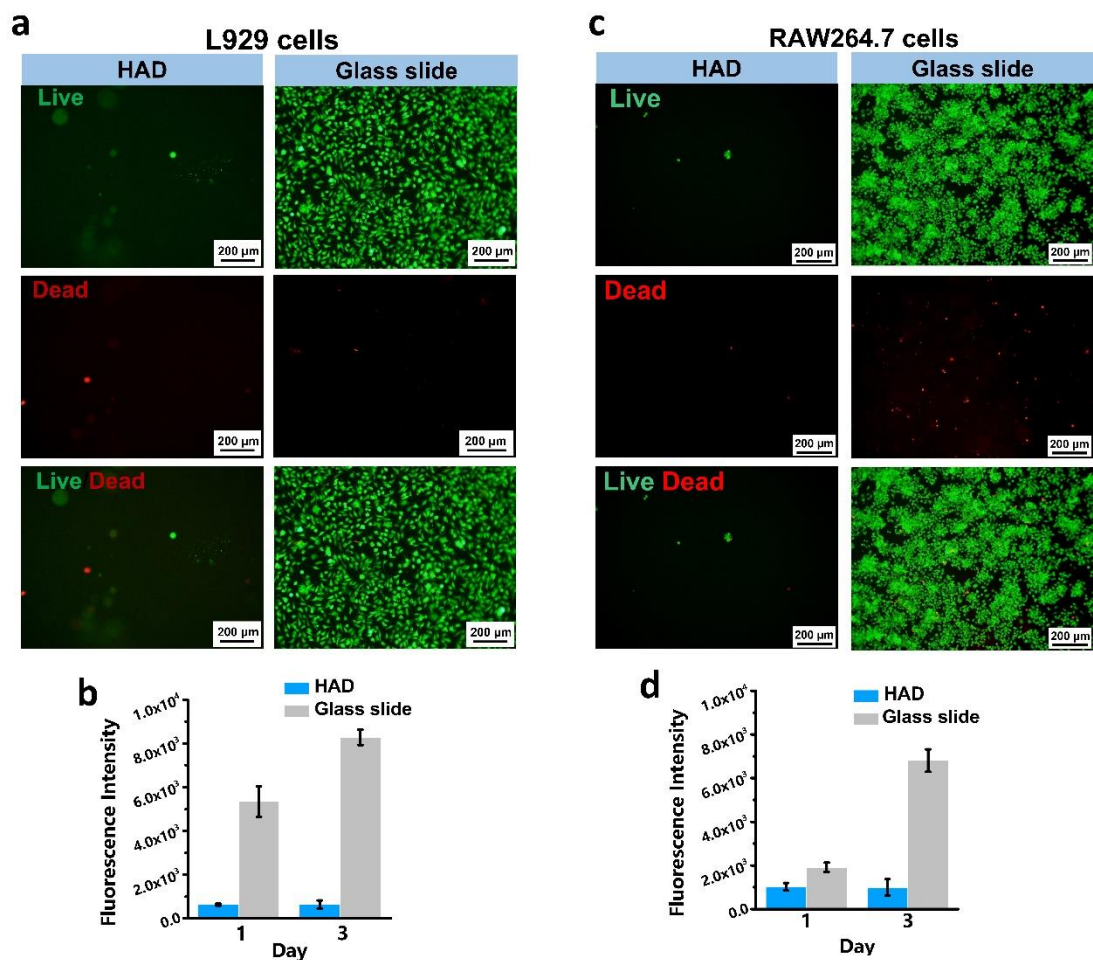

**Fig. S6.** The cell adhesion results of L929 cells and RAW264.7 cells on HAD hydrogel and glass slides (control). (a) Live/dead staining images of L929 cells seeded on HAD hydrogel and glass slides after 24 h. (b) Cell proliferation results of L929 cells cultured on HAD hydrogel and glass slides for 3 days. (c) Live/dead staining images of RAW264.7 cells seeded on HAD hydrogel and glass slides after 24 h. (d) Cell proliferation results of RAW264.7 cells cultured on HAD hydrogel and glass slides for 3 days.

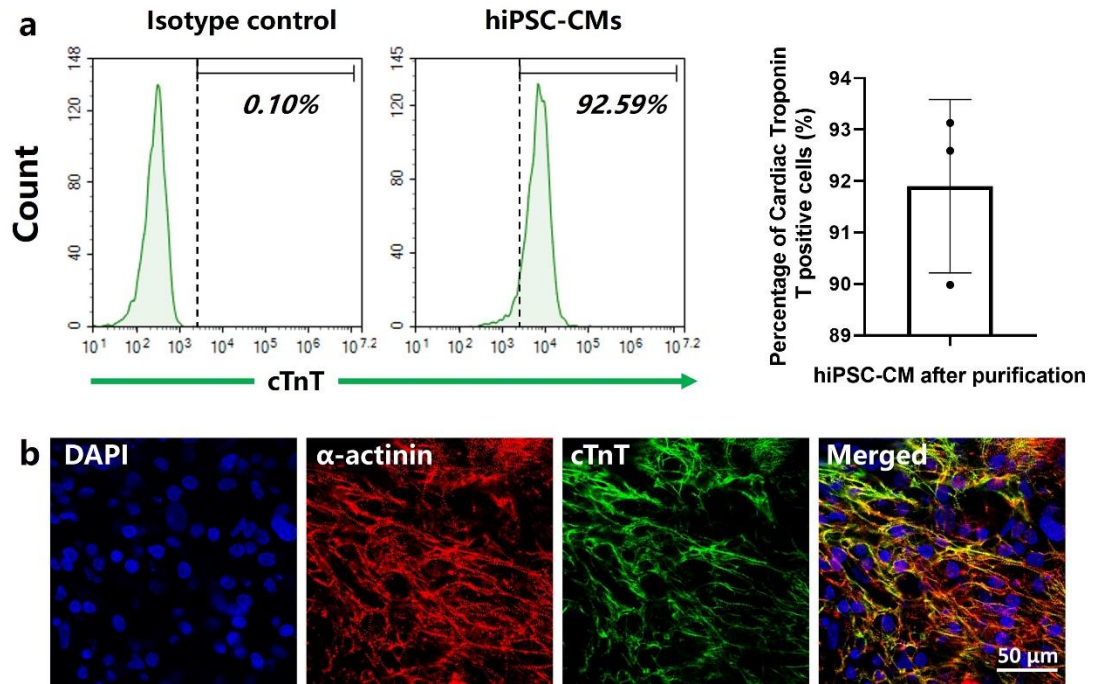

**Fig. S7.** Identification of hiPS-CMs via flow cytometry and immunofluorescence staining of  $\alpha$ -actinin and cTnT.



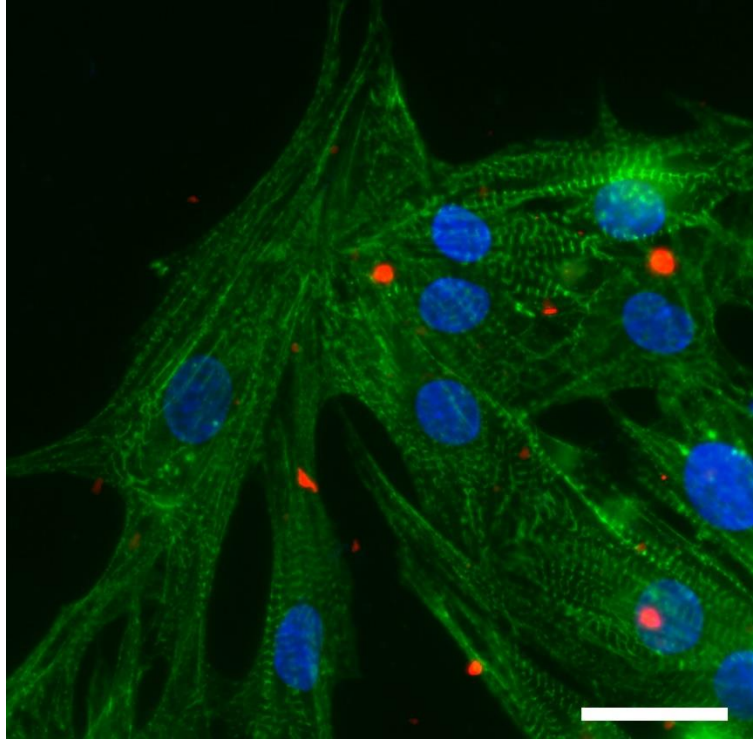

**Fig. S8.** PKH-26 labeled iCM-EXOs (red) were taken up by primary cardiomyocytes (green) *in vitro*. Bar = 25  $\mu$ m.

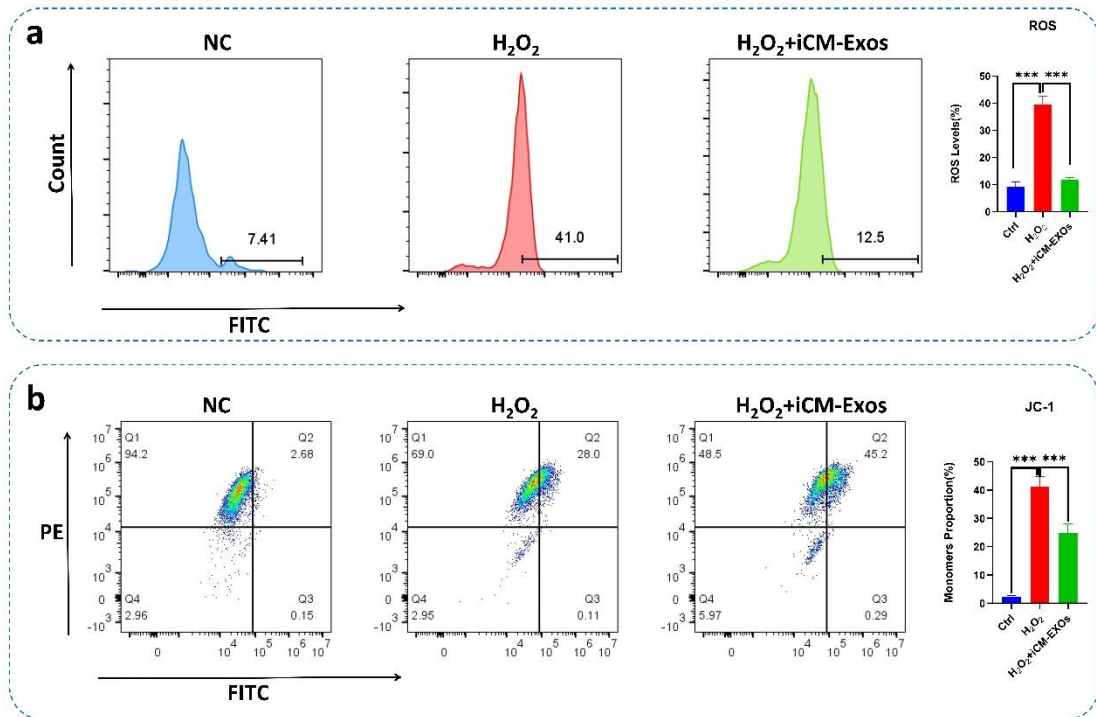

**Fig. S9.** Flow cytometry of cellular reactive oxygen species (a) and cellular mitochondrial membrane potential (b) in each group.

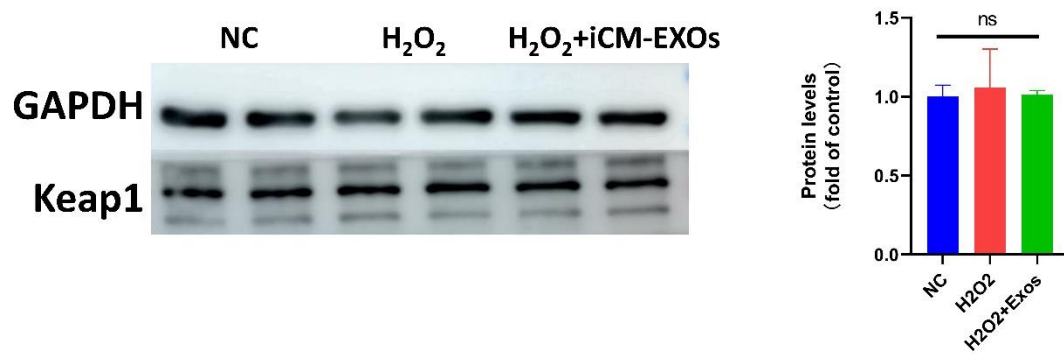

**Fig. S10.** Western blots and histograms of Keap1 protein in primary cardiomyocytes of each group. ns: no significant difference.

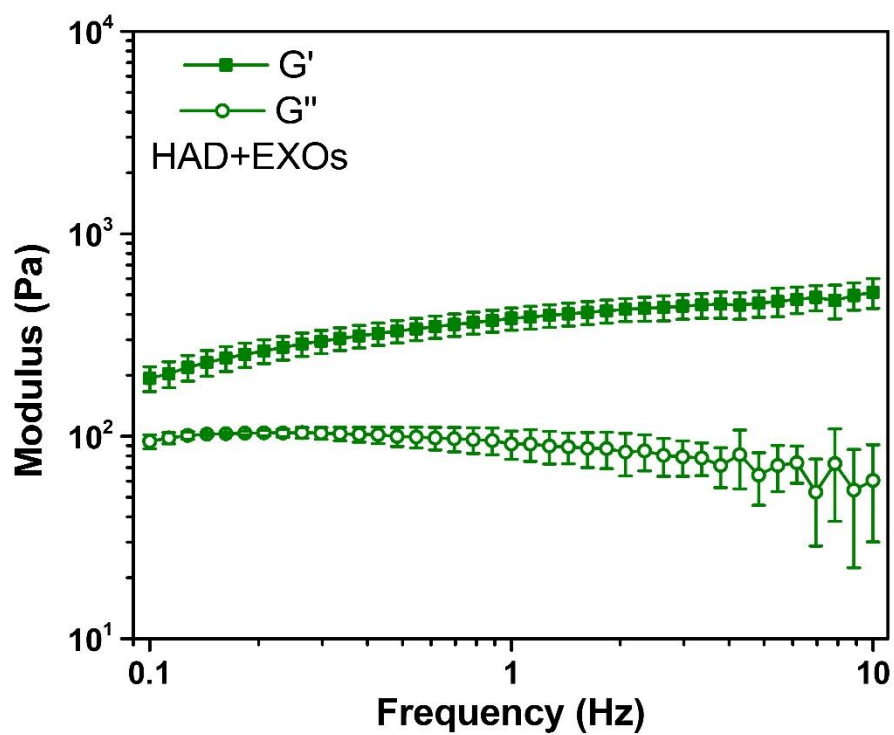

**Fig. S11.** The mechanical property of HAD+EXOs hydrogel.

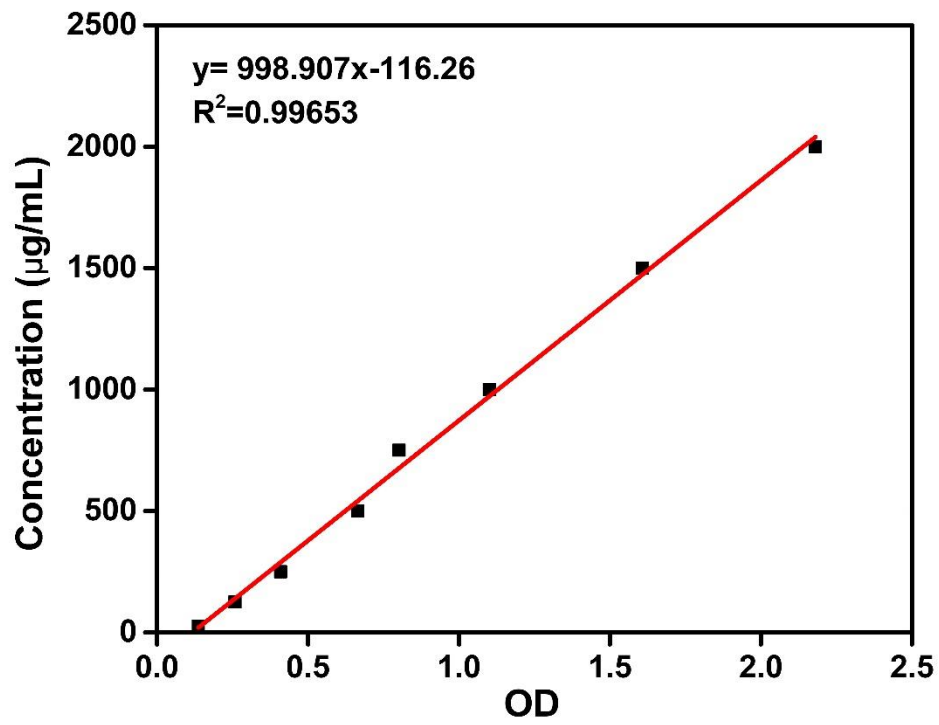

**Fig. S12.** The standard curve of iCM-EXOs was detected by a micro-BCA protein assay kit.

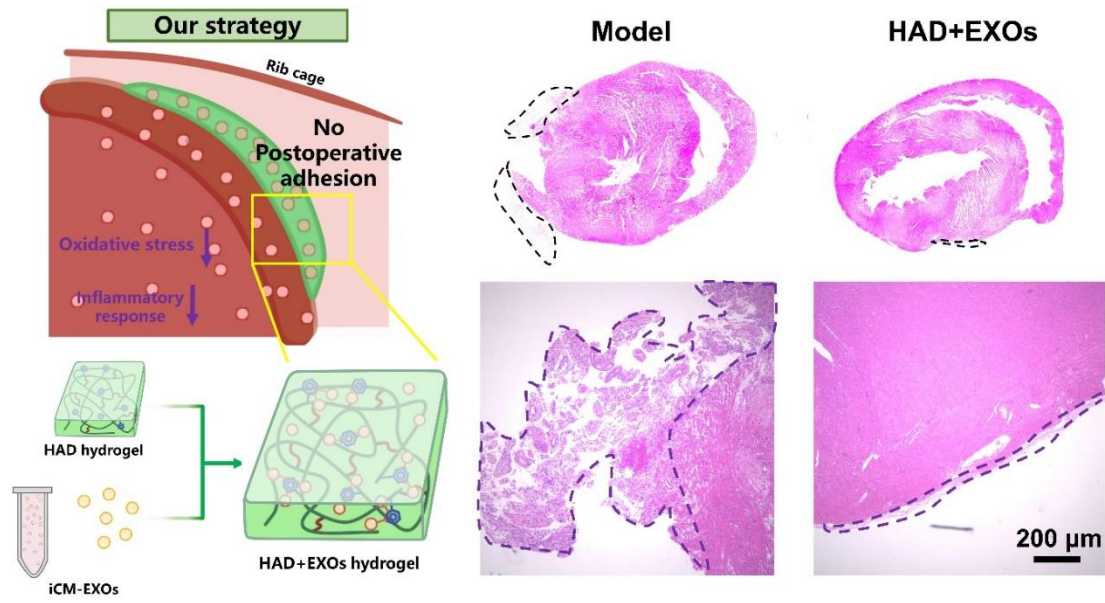

**Fig. S13.** Our strategy for post-heart surgery adhesion reduction.

**Table 1. PCR primers List for qRT-PCR**

| <b>Gene</b>   | <b>Primers</b>            |                          |
|---------------|---------------------------|--------------------------|
|               | <b>Forward</b>            | <b>Reverse</b>           |
| GAPDH         | ACGGCAAGTTCAACGGCACAG     | CGACATACTCAGCACCAGCATCAC |
| IL-1 $\beta$  | AATCTCACAGCAGCATCTCGACAAG | TCCACGGGCAAGACATAGGTAGC  |
| IL-6          | ACTTCCAGCCAGTTGCCTTCTTG   | TGGTCTGTTGTGGGTGGTATCCTC |
| TNF- $\alpha$ | CACCACGCTCTTCTGTCTACTGAAC | TGGGCTACGGGCTTGTCACTC    |

**Movie S1.** HAD hydrogel adhered on the porcine heart

**Movie S2.** HAD hydrogel effectively sealed the blood leakage from the crack on the porcine heart

**Movie S3.** The adhesive strength between HAD or HAMA hydrogel and porcine heart following the "sol-adhesive" process

**Movie S4.** The procedure of establishing a precardiac adhesion rat model
